# Supplementary material
Source: PubMed Central journal article supplement (PMC5602400)
Supplement: 10.1074_M117.788596_jbc.M117.788596-1.pdf [file 10.1074_M117.788596_jbc.M117.788596-1.pdf]

### Supplemental Table S1

Nucleotide sequences of the primers used for qPCR.

---

|           |                                                                             |
|-----------|-----------------------------------------------------------------------------|
| miR-21-5p | UAGCUUAUCAGACUGAUGUUGA<br>(hsa-miR-21-5p, 204230, Exiqon, Vedbaek, Denmark) |
| PTEN      | F: 5'-ACGACGGGAAGACAAGTTCA-3'<br>R: 5'-AGGTTTCCTCTGGTCCTGGT-3'              |
| PDCD4     | F: 5'-GGGAGTGACGCCCTTAGAAG-3'<br>R: 5'-ACCTTTCTTTGGTAGTCCCCTT-3'            |
| SPRY1     | F: 5'-CACTGCTGCTCTAGATACCTGTGT-3'<br>R: 5'-GCAGCTCTCCAGCTTACAATAGAC-3'      |
| SPRY2     | F: 5'-TGAGCTTAAGCCACTGAGCA-3'<br>R: 5'-ATCCAGTCTGATGGCAGAGG-3'              |
| GAPDH     | F: 5'-TGAACGGGAAGCTCACTGG-3'<br>R: 5'-TCCACCACCCTGTTGCTGTA-3'               |

---
