# Supplementary material
Source: PubMed Central journal article supplement (PMC5602400)
Supplement: 10.1074_M117.788596_jbc.M117.788596-2.pdf [file 10.1074_M117.788596_jbc.M117.788596-2.pdf]

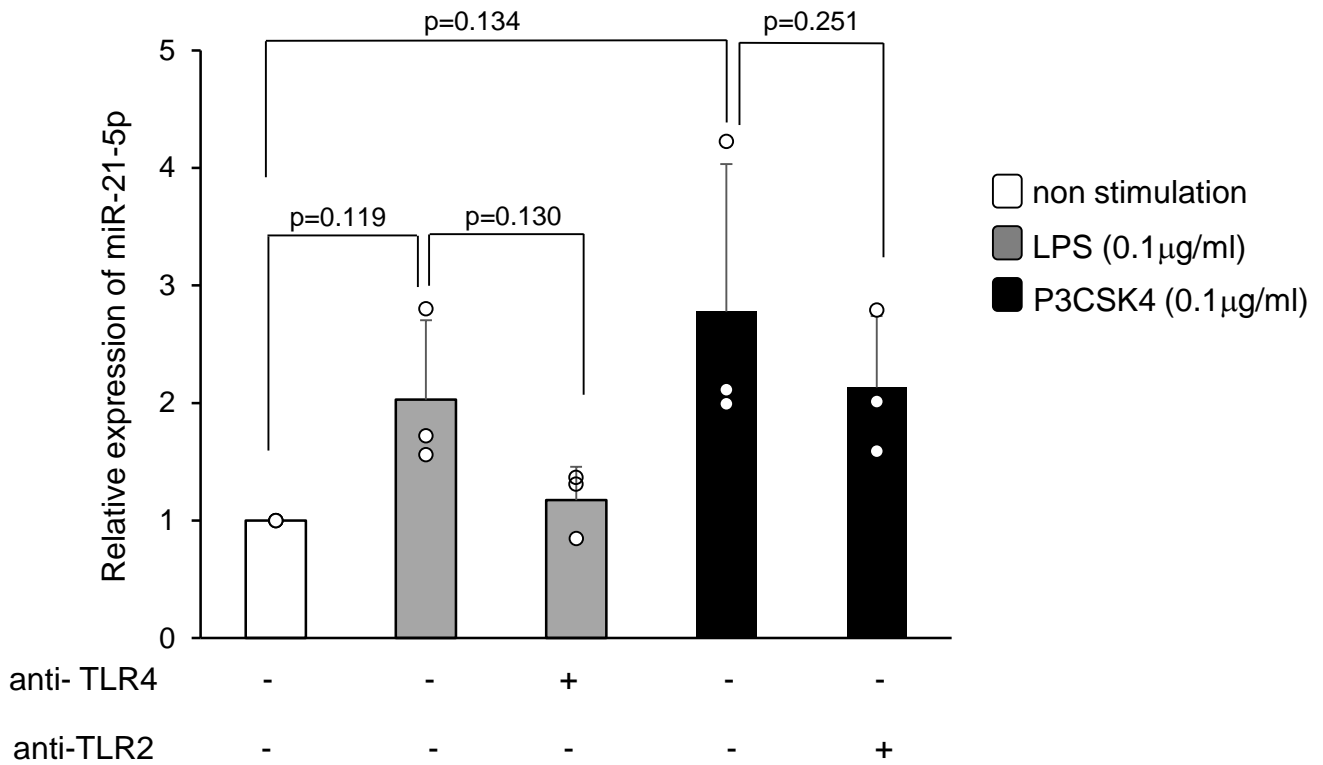

### Supplemental Figure S1

HT-29 cells were treated with 10 mg/ml neutralizing anti-human TLR4 (HTA125, eBioscience, San Diego, CA) and TLR2 (TL2.1, eBioscience) for 1 h, then stimulated with LPS or P3CSK4 for 24 h. miR-21-5p expression was analyzed by qRT-PCR. Values relative to expression in the absence of bacterial stimulation are shown. The results are expressed as mean  $\pm$  SD of 3 independent experiments.
